# Supplementary material
Source: publisher figshare collection journal article supplement (https://acs.figshare.com/ndownloader/files/28735977)
Supplement: Supplementary file 1 [file 28735977]

# Supporting Information

## Orbital Contribution to Paramagnetism and Non-Innocent Thiophosphate Anions in Layered $\text{Li}_2\text{MP}_2\text{S}_6$ where $M = \text{Fe}, \text{Co}$

Timothy J. Diethrich<sup>1</sup>, Peter Zavalij<sup>1</sup>, Stephanie Gnewuch<sup>1</sup>, and Efrain E. Rodriguez<sup>1\*</sup>

<sup>1</sup>Department of Chemistry and Biochemistry, University of Maryland, College Park, MD 20742

\*Corresponding Author – efrain@umd.edu

### Table of Contents

|                                                                                                                                             |       |
|---------------------------------------------------------------------------------------------------------------------------------------------|-------|
| <b>1. Synthesis and crystal figures</b>                                                                                                     | S1-S3 |
| <b>Figure S1.</b> Solid state synthesis experimental setup.                                                                                 | S1    |
| <b>Figure S2.</b> Single crystal heating profiles.                                                                                          | S2    |
| <b>Figure S3.</b> Single crystal photographs                                                                                                | S3    |
| <b>2. Experimental results</b>                                                                                                              | S4-S9 |
| <b>Figure S4.</b> Powder X-ray diffraction data and Rietveld fit for $\text{Li}_{2.26}\text{Fe}_{0.94}\text{P}_2\text{S}_6$ .               | S4    |
| <b>Figure S5.</b> Powder X-ray diffraction data and Rietveld fit for $\text{Li}_{1.56}\text{Co}_{0.71}\text{P}_2\text{S}_6$ .               | S5    |
| <b>Figure S6.</b> Magnetic susceptibility and Curie Weiss of $\text{Li}_{2.26}\text{Fe}_{0.94}\text{P}_2\text{S}_6$ at 1,000 Oe and 100 Oe. | S6    |
| <b>Figure S7.</b> Magnetic susceptibility and Curie Weiss of $\text{Li}_{1.56}\text{Co}_{0.71}\text{P}_2\text{S}_6$ powder samples.         | S7    |
| <b>Figure S8.</b> Neutron powder diffraction of $\text{Li}_{2.26}\text{Fe}_{0.94}\text{P}_2\text{S}_6$ zoomed in.                           | S8    |
| <b>Figure S9.</b> Neutron powder diffraction of $\text{Li}_{1.56}\text{Co}_{0.71}\text{P}_2\text{S}_6$ demonstrating impurity.              | S9    |

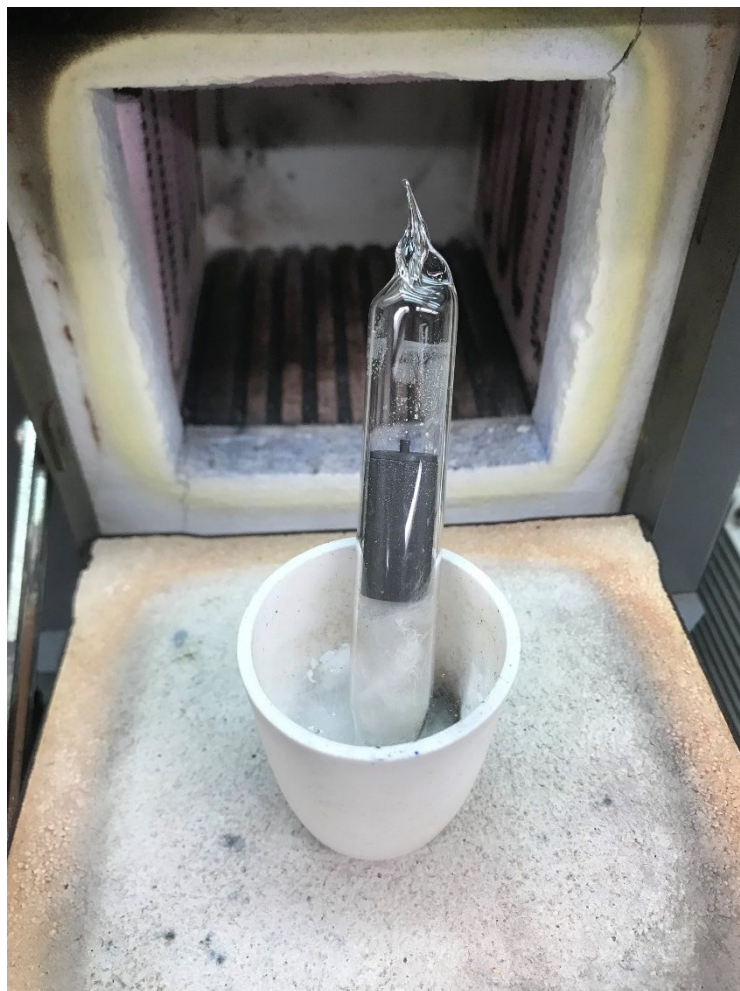

**Figure S1.** Solid-state synthesis setup. Stoichiometric ratios of starting reagents are ground together and placed in the graphite crucible shown above. This crucible is then sealed in a quartz ampoule.

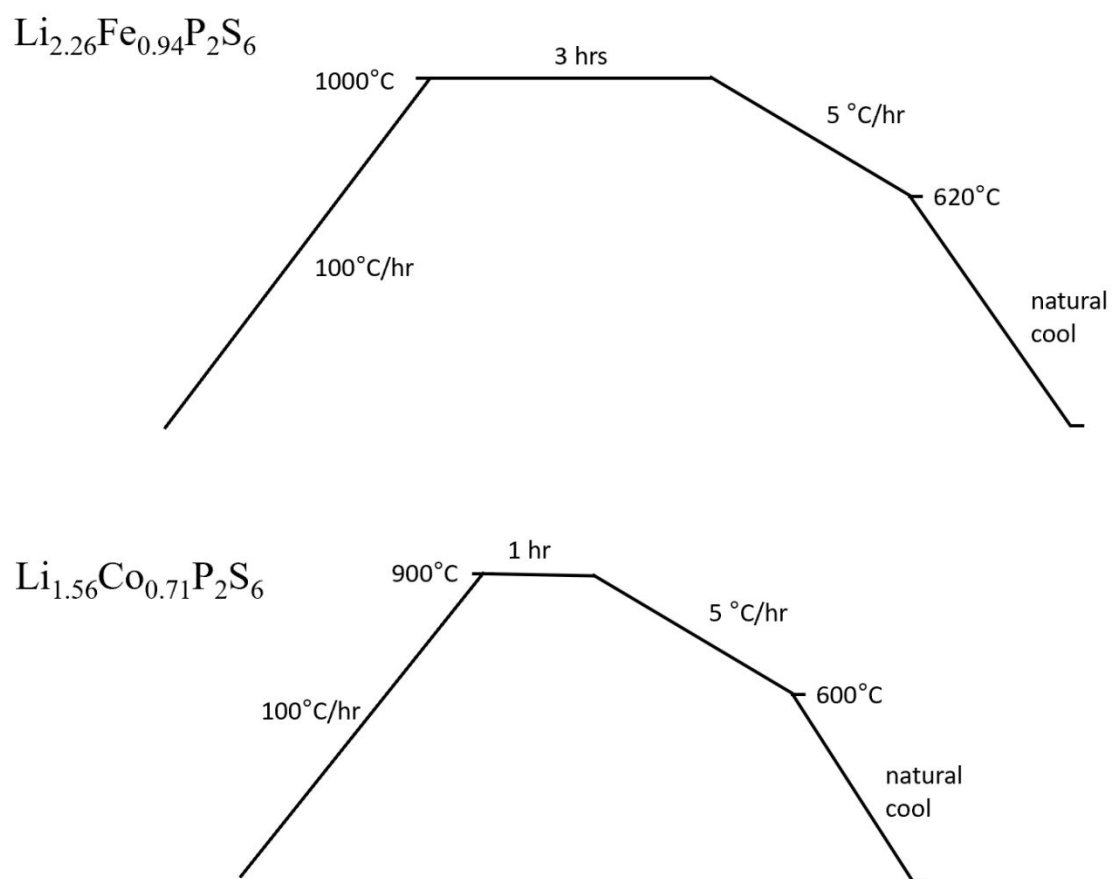

**Figure S2.** “Bridgman-like” single crystal heating profiles for the iron and cobalt thiophosphates.

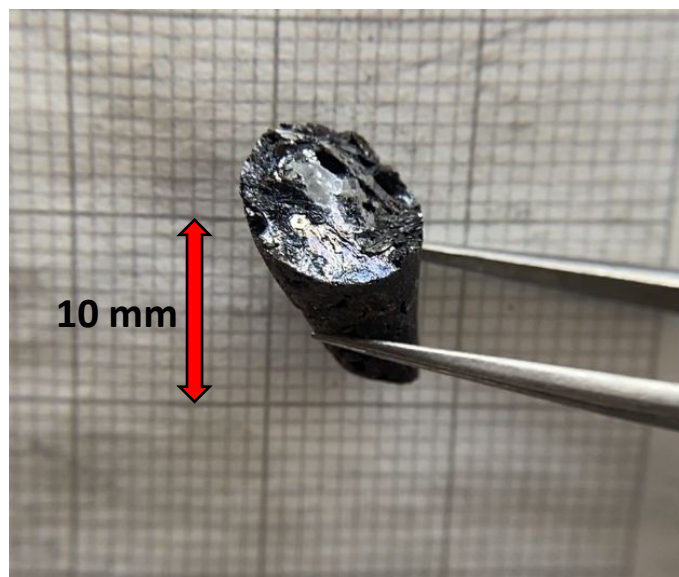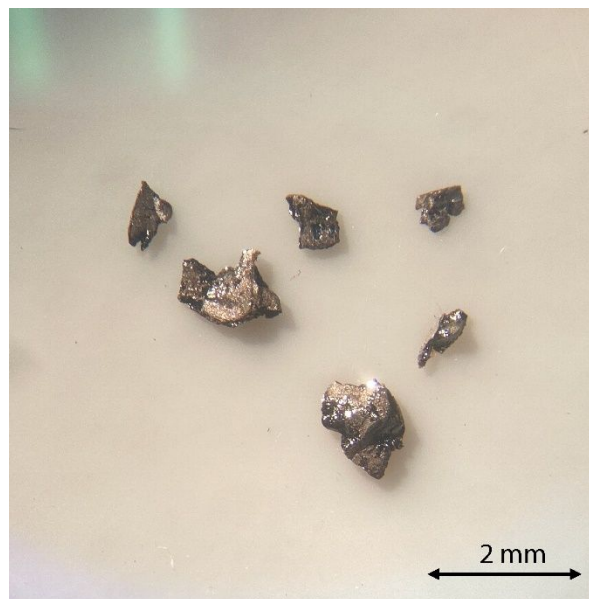

**Figure S3.** Example  $\text{Li}_{1.56}\text{Co}_{0.71}\text{P}_2\text{S}_6$  single crystals. These crystals grow in a layered manner; when broken off from the bulk, they are about 1-4 mm long with a shiny metallic surface that degrades within seconds of contact with air.

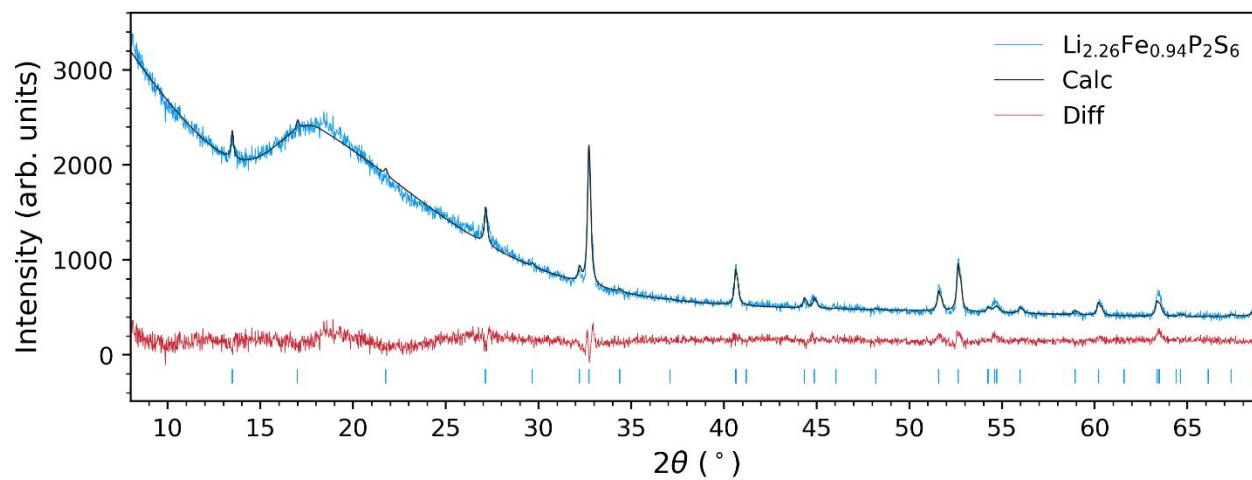

**Figure S4.** X-ray powder diffraction and Rietveld fit of  $\text{Li}_{2.26}\text{Fe}_{0.94}\text{P}_2\text{S}_6$ . The large broad peak at approximately  $18^\circ$   $2\theta$  is due to Kapton tape used to minimize air exposure during experiment.

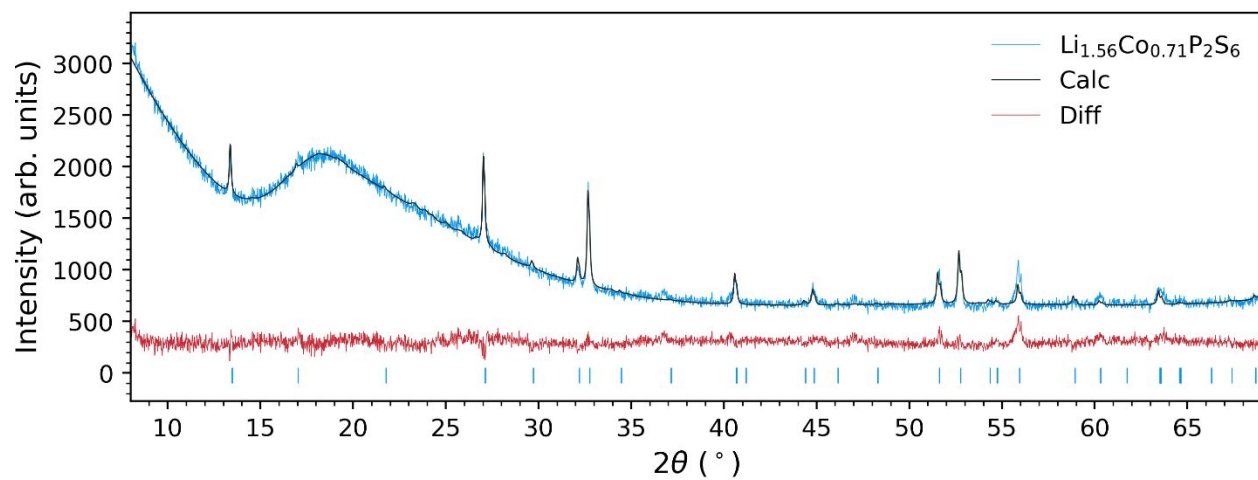

**Figure S5.** X-ray powder diffraction and Rietveld fit of  $\text{Li}_{1.56}\text{Co}_{0.71}\text{P}_2\text{S}_6$ . The large broad peak at approximately  $18^\circ 2\theta$  is due to Kapton tape used to minimize air exposure during experiment.

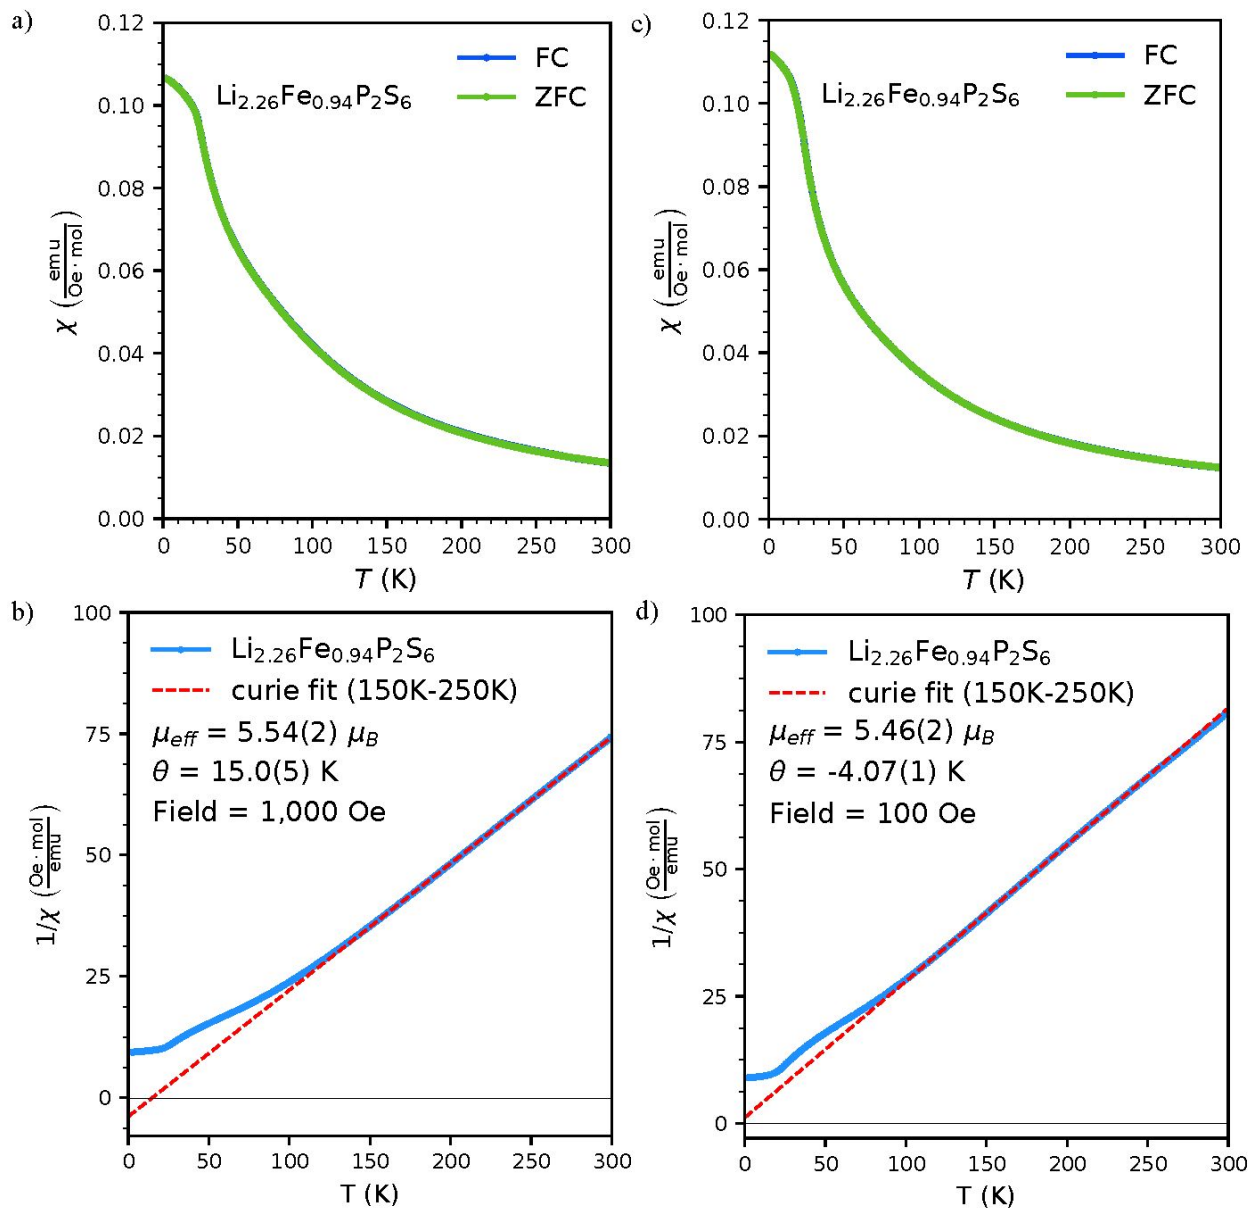

**Figure S6.** Field cooled (FC) and Zero-field cooled (ZFC) of  $\text{Li}_{2.26}\text{Fe}_{0.94}\text{P}_2\text{S}_6$  at 1,000 Oe (a) and 100 Oe (b). Curie-Weiss fit extracts a magnetic moment of  $5.54(2) \mu_B$  for 1,000 Oe (c) and  $5.46(2) \mu_B$  for 100 Oe (d).

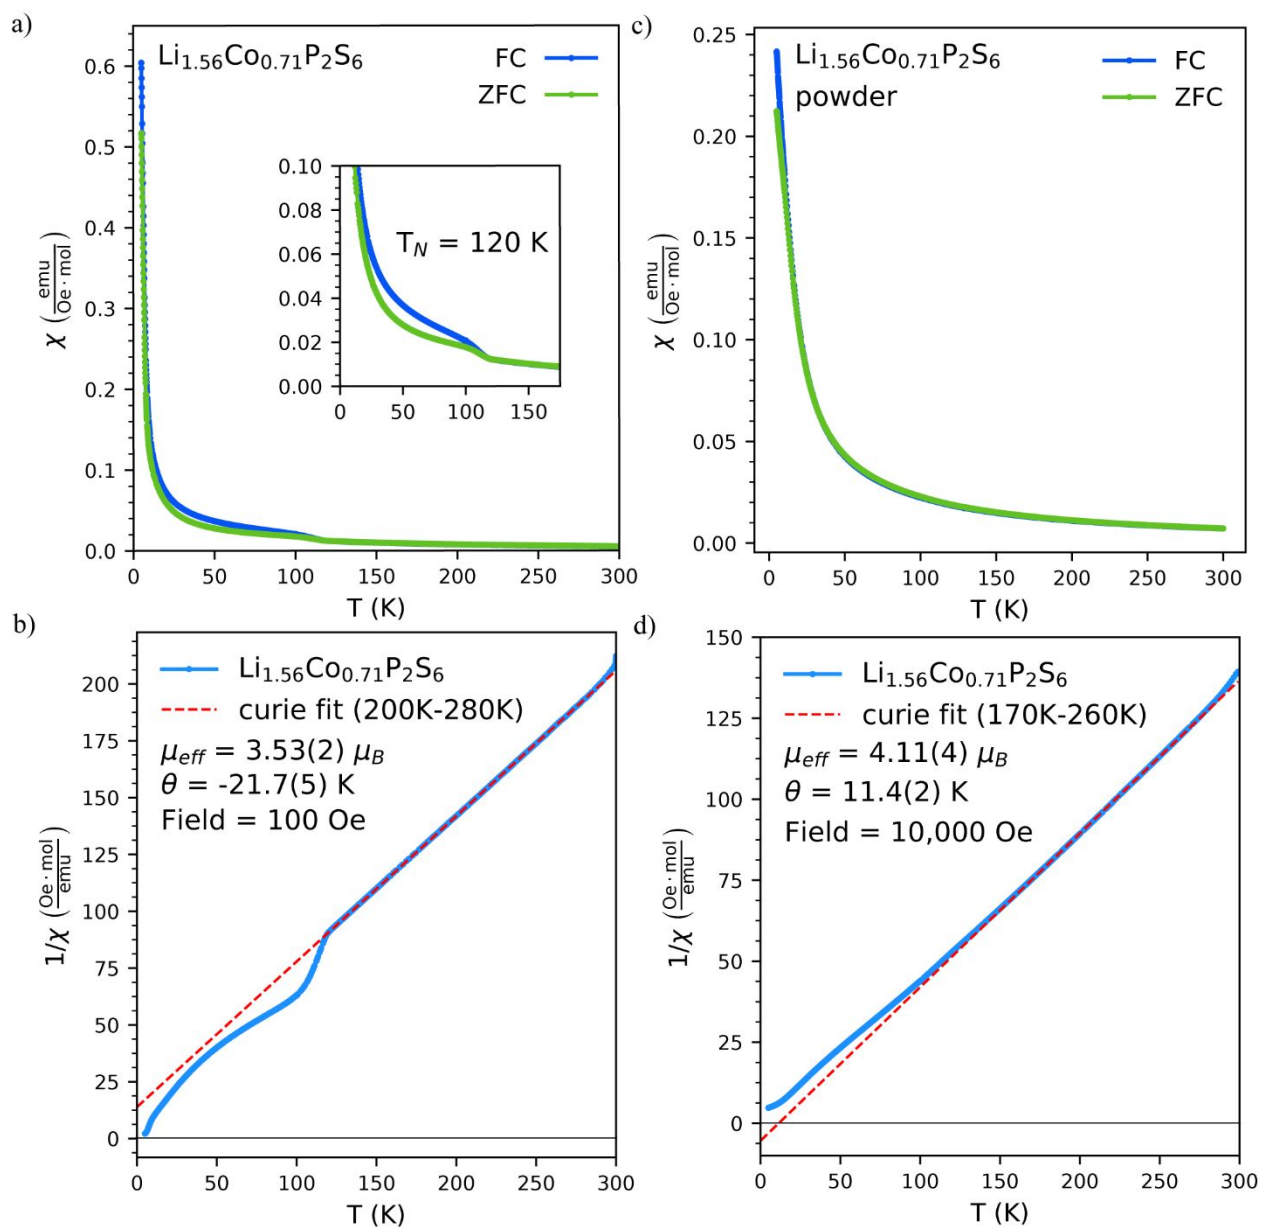

**Figure S7.** Field cooled (FC) and Zero-field cooled (ZFC) of  $\text{Li}_{1.56}\text{Co}_{0.71}\text{P}_2\text{S}_6$  powder at 100 Oe (a) and 10,000 Oe (b), the inset shows a small deviation at 120 K. (b) Curie-Weiss fit extracts a magnetic moment of  $3.53(2) \mu_B$  (c) and  $4.11(4) \mu_B$  (d) respectively.



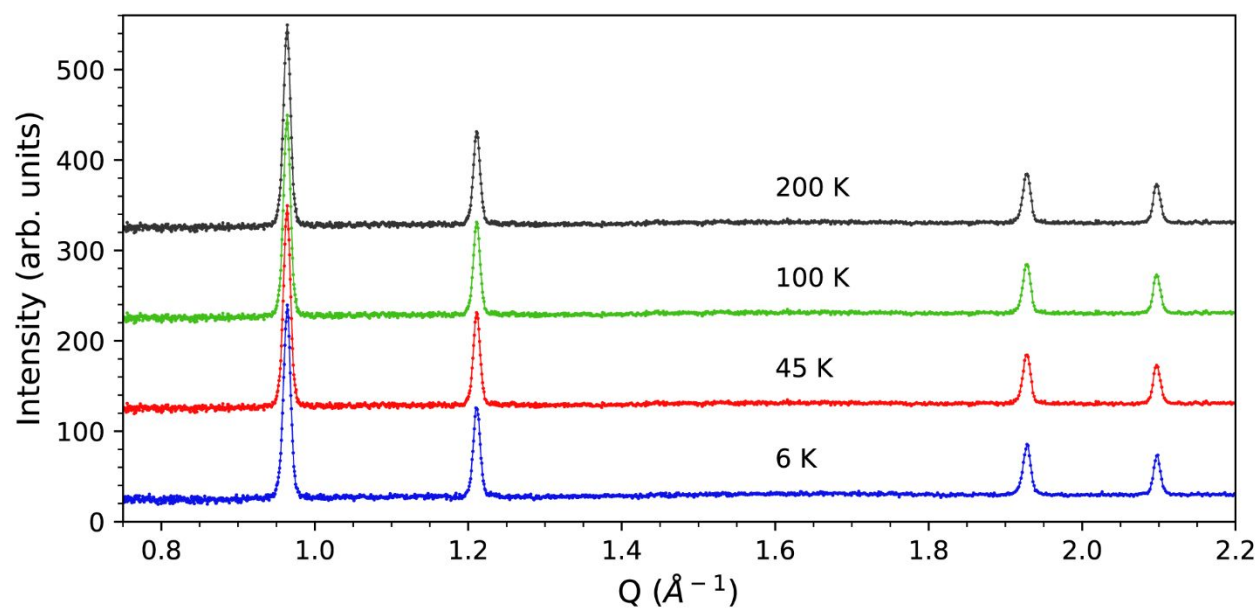

**Figure S8.** This is Figure 8 (neutron powder diffraction of  $\text{Li}_{2.04}\text{Fe}_{1.12}\text{P}_2\text{S}_6$ ) zoomed in to four diffraction patterns at low  $Q$ . There is no substantial difference in the different temperature scans.

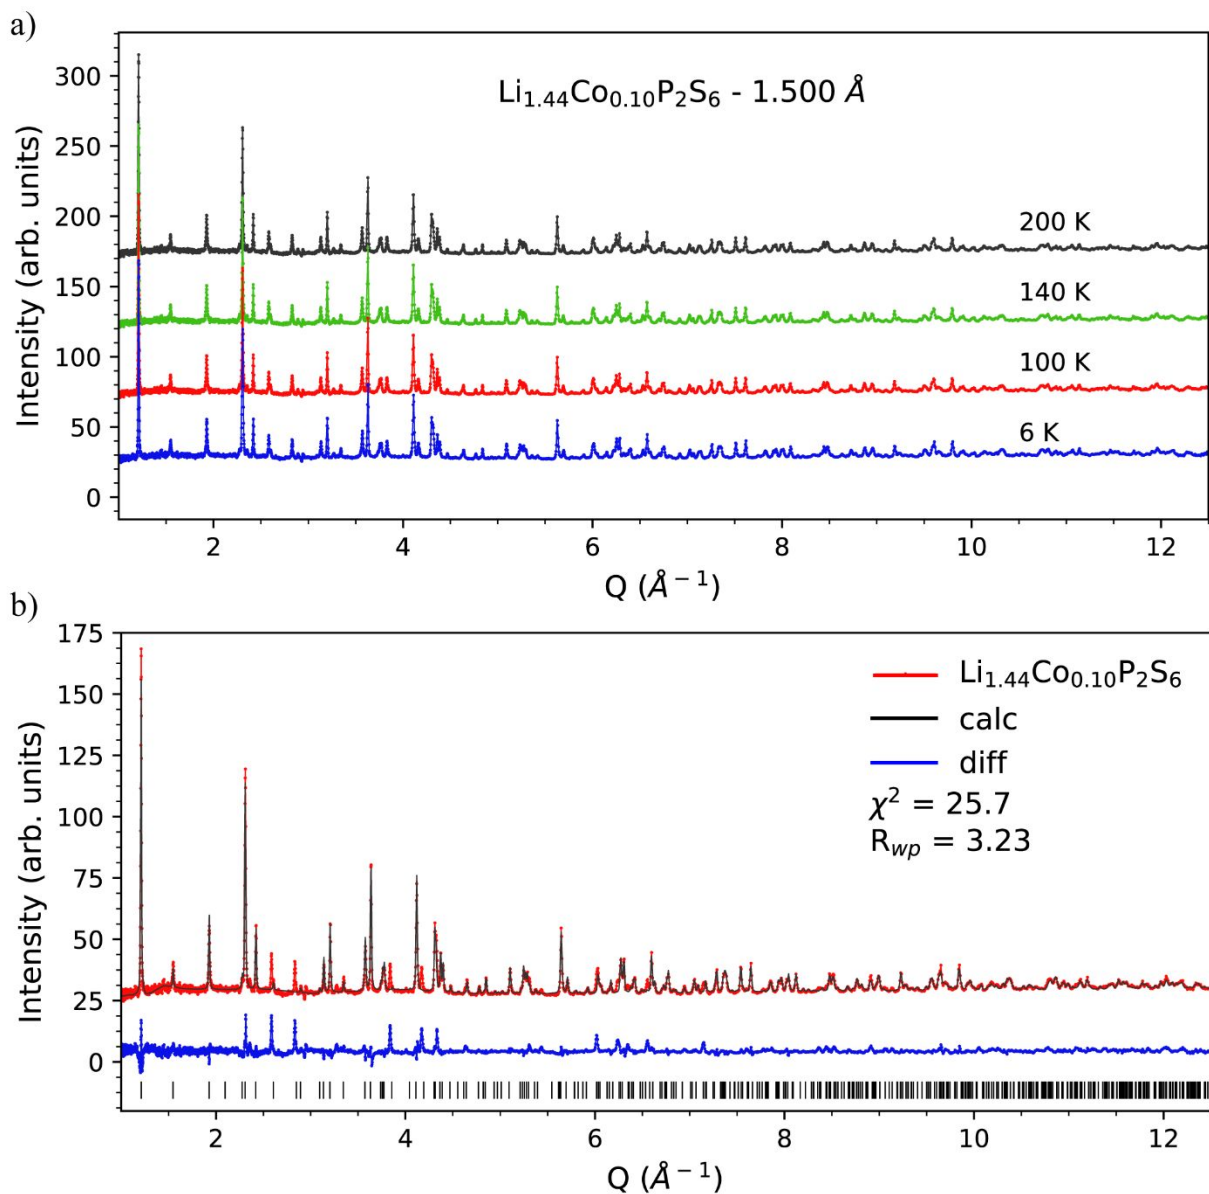

**Figure S9.** Neutron powder diffraction of  $\text{Li}_{1.73}\text{Co}_{0.43}\text{P}_2\text{S}_6$  from the POWGEN diffractometer (SNS, ORNL). (a) All patterns look identical across the four measured temperatures suggesting no magnetic ordering. (b) Rietveld refinement demonstrates an impurity that is clearly present in this sample.
